# Supplementary material
Source: Springer Nature journal article supplement (https://www.springermedizin.de/resource/supplementary/12885_2012_3887_MOESM2_ESM.pdf/9464700)

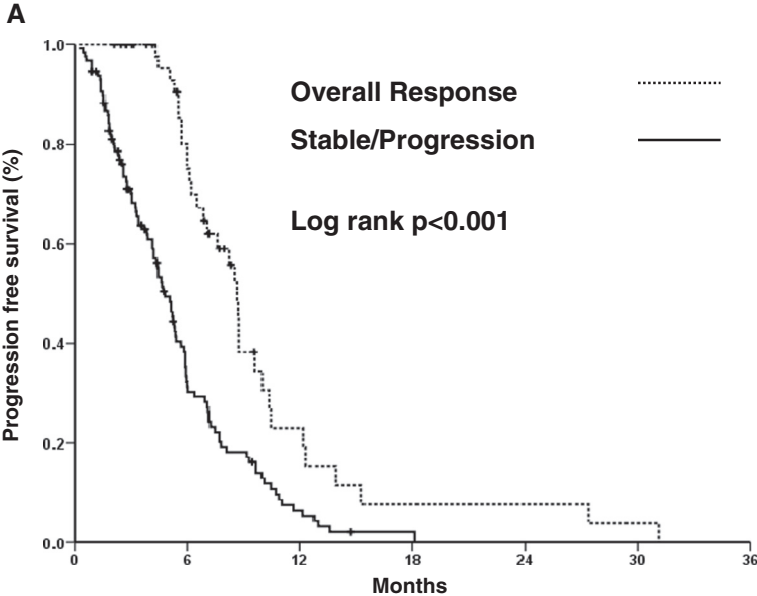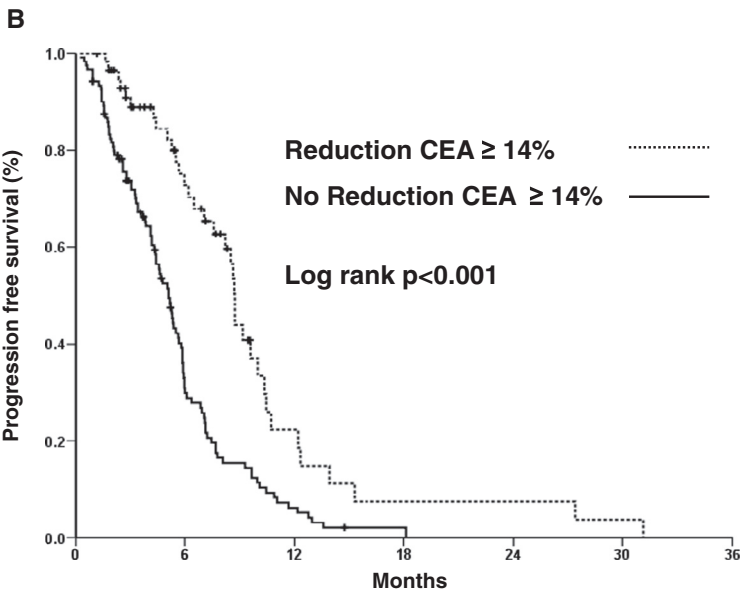

Supplement: MOESM2 [file 9464700]
